# Supplementary material for: Mass Spectrometry-Based Method of Detecting and Distinguishing Type 1 and Type 2 Shiga-Like Toxins in Human Serum
Source: PubMed Central journal article supplement (PMC4690125; doi:10.3390/toxins7124875), 2015-12-02
Supplement: toxins-07-04875-s001.pdf [file toxins-07-04875-s001.pdf]

# Supplementary Materials: Mass Spectrometry-Based Method of Detecting and Distinguishing Type 1 and Type 2 Shiga-Like Toxins in Human Serum

**Table S1.** A table of instrument parameters, collision energy (CE), declustering potential (DP), entrance potential (EP), and collision exit potential (CXP) for the listed peptides from Stx1 and Stx2 subtypes.

| Specificity    | Peptide    | Ion            | <sup>14</sup> N<br>or <sup>15</sup> N | Q1 Mass<br>(Da) | Q3 Mass<br>(Da) | Dwell<br>(msec) | DP   | EP   | CE   | CXP  |
|----------------|------------|----------------|---------------------------------------|-----------------|-----------------|-----------------|------|------|------|------|
| Stx2           | IEFSK      | y <sup>3</sup> | <sup>14</sup> N                       | 312.2           | 381.1           | 50              | 70   | 10.2 | 17   | 5.8  |
|                |            | y <sup>4</sup> |                                       | 312.2           | 510.1           | 50              | 70   | 10.2 | 17   | 8    |
| Stx2           | IEFSK      | y <sup>3</sup> | <sup>15</sup> N                       | 315.2           | 385.2           | 50              | 70   | 10.2 | 17   | 5.8  |
|                |            | y <sup>4</sup> |                                       | 315.2           | 515.3           | 50              | 70   | 10.2 | 17   | 8    |
| Stx1           | VEYTK      | y <sup>3</sup> | <sup>14</sup> N                       | 320.4           | 411.1           | 50              | 80.2 | 10.6 | 17.7 | 5.9  |
|                |            | y <sup>4</sup> |                                       | 320.4           | 540.1           | 50              | 80.2 | 10.6 | 18   | 9.9  |
| Stx1           | VEYTK      | y <sup>3</sup> | <sup>15</sup> N                       | 323.2           | 415.2           | 50              | 80.2 | 10.6 | 17.7 | 5.9  |
|                |            | y <sup>4</sup> |                                       | 323.2           | 545.3           | 50              | 80.2 | 10.6 | 18   | 9.9  |
| Stx1a          | ELFTNR     | a <sub>2</sub> | <sup>14</sup> N                       | 390.21          | 215.14          | 50              | 65   | 10.6 | 26.5 | 4.3  |
|                |            | y <sub>2</sub> |                                       | 390.21          | 289.16          | 50              | 65   | 10.6 | 18.4 | 7.1  |
|                |            | y <sub>4</sub> |                                       | 390.21          | 537.28          | 50              | 65   | 10.6 | 22.5 | 8.5  |
| Stx1a          | ELFTNR     | a <sub>2</sub> | <sup>15</sup> N                       | 395.19          | 217.13          | 50              | 65   | 10.6 | 26.5 | 4.3  |
|                |            | y <sub>2</sub> |                                       | 395.19          | 295.14          | 50              | 65   | 10.6 | 18.4 | 7.1  |
|                |            | y <sub>4</sub> |                                       | 395.19          | 545.25          | 50              | 65   | 10.6 | 22.5 | 8.5  |
| Stx1e          | ELYTTR     | y <sub>2</sub> | <sup>14</sup> N                       | 391.71          | 276.17          | 50              | 67   | 8.77 | 17.7 | 15   |
|                |            | y <sub>3</sub> |                                       | 391.71          | 377.21          | 50              | 67   | 8.77 | 20   | 15   |
|                |            | y <sub>4</sub> |                                       | 391.71          | 540.28          | 50              | 67   | 8.77 | 22   | 15   |
| Stx1e          | ELYTTR     | y <sub>2</sub> | <sup>15</sup> N                       | 396.19          | 281.15          | 50              | 67   | 8.77 | 17.7 | 15   |
|                |            | y <sub>3</sub> |                                       | 396.19          | 383.2           | 50              | 67   | 8.77 | 20   | 15   |
|                |            | y <sub>4</sub> |                                       | 396.19          | 547.26          | 50              | 67   | 8.77 | 22   | 15   |
| Stx2a, c, d    | EYWTSR     | y <sup>3</sup> | <sup>14</sup> N                       | 421.2           | 363.1           | 50              | 75   | 10.4 | 22   | 10.2 |
|                |            | y <sup>4</sup> |                                       | 421.2           | 549.1           | 50              | 75   | 10.4 | 23   | 8.4  |
| Stx2a, c, d    | EYWTSR     | y <sup>3</sup> | <sup>15</sup> N                       | 426.3           | 369.2           | 50              | 75   | 10.4 | 22   | 10.2 |
|                |            | y <sup>4</sup> |                                       | 426.3           | 557.3           | 50              | 75   | 10.4 | 23   | 8.4  |
| Stx2b, e, f, g | EYWTNR     | y <sup>3</sup> | <sup>14</sup> N                       | 434.9           | 390.1           | 50              | 75   | 10.1 | 22   | 5.3  |
|                |            | y <sup>4</sup> |                                       | 434.9           | 576.1           | 50              | 75   | 10.1 | 24   | 9.8  |
| Stx2b, e, f, g | EYWTNR     | y <sup>3</sup> | <sup>15</sup> N                       | 440.2           | 397.2           | 50              | 75   | 10.1 | 22   | 5.3  |
|                |            | y <sup>4</sup> |                                       | 440.2           | 585.3           | 50              | 75   | 10.1 | 24   | 9.8  |
| Stx2g          | YNGDNTFTVK | b <sub>2</sub> | <sup>14</sup> N                       | 579.8           | 278.1           | 50              | 114  | 11   | 27.6 | 15   |
|                |            | y <sub>6</sub> |                                       | 579.8           | 709.4           | 50              | 114  | 11   | 27.6 | 15   |
|                |            | y <sub>7</sub> |                                       | 579.8           | 824.4           | 50              | 114  | 11   | 27.6 | 15   |
|                |            | y <sub>8</sub> |                                       | 579.8           | 881.5           | 50              | 114  | 11   | 26.3 | 15   |
| Stx2g          | YNGDNTFTVK | b <sub>2</sub> | <sup>15</sup> N                       | 586.3           | 281.1           | 50              | 114  | 9.13 | 29   | 15   |
|                |            | y <sub>6</sub> |                                       | 586.3           | 717.4           | 50              | 90   | 9.13 | 29   | 15   |
|                |            | y <sub>7</sub> |                                       | 586.3           | 833.4           | 50              | 90   | 9.13 | 29   | 15   |
|                |            | y <sub>8</sub> |                                       | 586.3           | 891.4           | 50              | 90   | 9.13 | 27.5 | 15   |

**Table S1. Cont.**

| Specificity          | Peptide    | Ion | <sup>14</sup> N<br>or <sup>15</sup> N | Q1 Mass<br>(Da) | Q3 Mass<br>(Da) | Dwell<br>(msec) | DP  | EP   | CE   | CXP |
|----------------------|------------|-----|---------------------------------------|-----------------|-----------------|-----------------|-----|------|------|-----|
| Stx1-E29             | YNDDDTFTAK | b2  |                                       | 595.25          | 278.11          | 50              | 90  | 9.13 | 29   | 15  |
|                      |            | y6  | <sup>14</sup> N                       | 595.25          | 682.34          | 50              | 90  | 9.13 | 29   | 15  |
|                      |            | y7  |                                       | 595.25          | 797.37          | 50              | 90  | 9.13 | 29   | 15  |
|                      |            | y8  |                                       | 595.25          | 912.4           | 50              | 90  | 9.13 | 27.5 | 15  |
| Stx1-E29             | YNDDDTFTAK | b2  |                                       | 601.24          | 281.11          | 50              | 90  | 9.13 | 29   | 15  |
|                      |            | y6  | <sup>15</sup> N                       | 601.24          | 689.32          | 50              | 90  | 9.13 | 29   | 15  |
|                      |            | y7  |                                       | 601.24          | 805.34          | 50              | 90  | 9.13 | 29   | 15  |
|                      |            | y8  |                                       | 601.24          | 921.37          | 50              | 90  | 9.13 | 29   | 15  |
| Stx1a, e             | YNDDDTFTVK | b2  |                                       | 609.3           | 278.1           | 50              | 125 | 11   | 29.4 | 15  |
|                      |            | y6  | <sup>14</sup> N                       | 609.3           | 710.4           | 50              | 125 | 11   | 29.4 | 15  |
|                      |            | y7  |                                       | 609.3           | 825.4           | 50              | 125 | 11   | 29.4 | 15  |
|                      |            | y8  |                                       | 609.3           | 940.4           | 50              | 125 | 11   | 28.7 | 15  |
| Stx1a, e             | YNDDDTFTVK | b2  |                                       | 615.3           | 281.1           | 50              | 125 | 11   | 29.4 | 15  |
|                      |            | y6  | <sup>15</sup> N                       | 615.3           | 717.4           | 50              | 125 | 11   | 29.4 | 15  |
|                      |            | y7  |                                       | 615.3           | 833.4           | 50              | 125 | 11   | 29.4 | 15  |
|                      |            | y8  |                                       | 615.3           | 949.4           | 50              | 125 | 11   | 28.7 | 15  |
| Stx2b, c, d<br>Stx2e | YNENDTFTVK | b2  | <sup>14</sup> N                       | 615.8           | 278.2           | 50              | 115 | 11   | 29.2 | 15  |
|                      | YNEDNTFTVK | y8  |                                       | 615.8           | 953.4           | 50              | 115 | 11   | 28   | 15  |
| Stx2a, f             | YNEDDTFTVK | b2  | <sup>15</sup> N                       | 616.3           | 278.1           | 50              | 115 | 11   | 29.2 | 15  |
|                      | YNEDDTFTVK | y8  |                                       | 616.3           | 954.4           | 50              | 115 | 11   | 28   | 15  |
| Stx2b, c, d, e, f    | YNEDDTFTVK | b2  |                                       | 622.3           | 281.1           | 50              | 115 | 11   | 29.2 | 15  |
|                      | YNENDTFTVK |     | <sup>15</sup> N                       |                 |                 |                 |     |      |      |     |
|                      | YNEDNTFTVK | y8  |                                       | 622.3           | 963.4           | 50              | 115 | 11   | 28   | 15  |

**Table S2.** Retention times of peptides used in this study. The retention times are derived from the MRM analysis of the trypsin digest of the <sup>15</sup>N-labeled Stx-IS protein.

| Peptide    | Retention Time (min) |
|------------|----------------------|
| YNDDDTFTVK | 11.51                |
| YNDDDSFTVK | 11.33                |
| YNDDDTFTAK | 10.78                |
| EYWTNR     | 11.28                |
| EYWTSR     | 11.28                |
| ELYTTR     | 10.52                |
| ELFTNR     | 11.60                |
| IEFSK      | 11.00                |

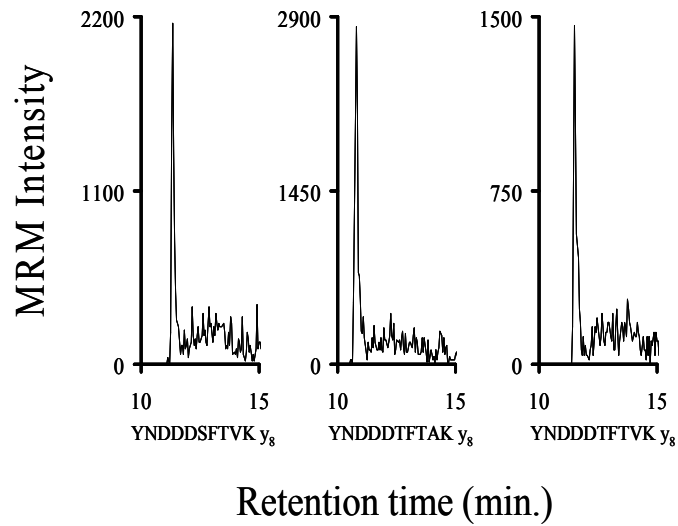

**Figure S1.** MRM signal intensities for the  $y_8$  ions from the  $^{15}\text{N}$ -labeled analyte peptides for Stx1. The signals from the peptides are derived from the trypsin digest of the  $^{15}\text{N}$ -labeled Stx internal standard protein.

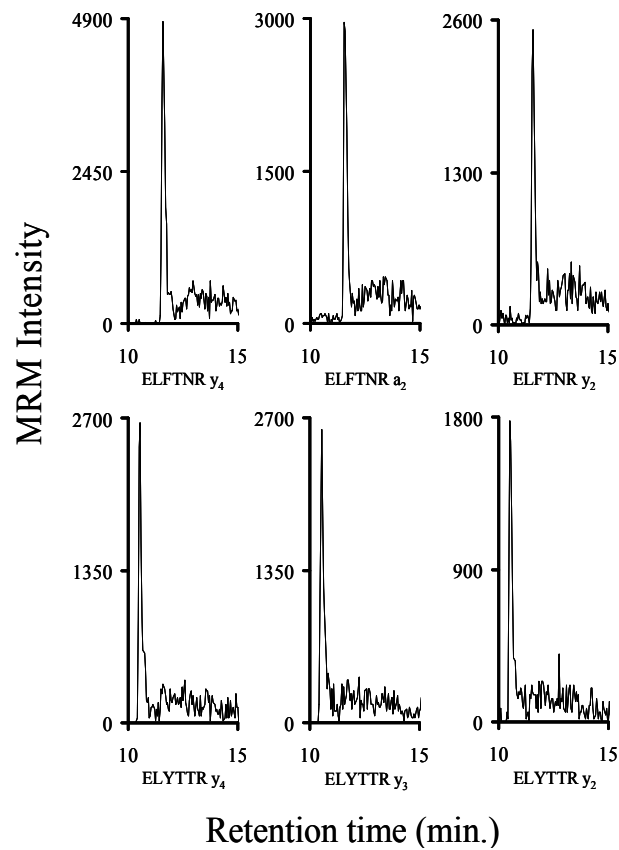

**Figure S2.** MRM signal intensities for the three most intense ions from ELFTNR (Stx1a) and ELYTTR (Stx1e). The signals from the peptides are derived from the trypsin digest of the  $^{15}\text{N}$ -labeled Stx internal standard protein.

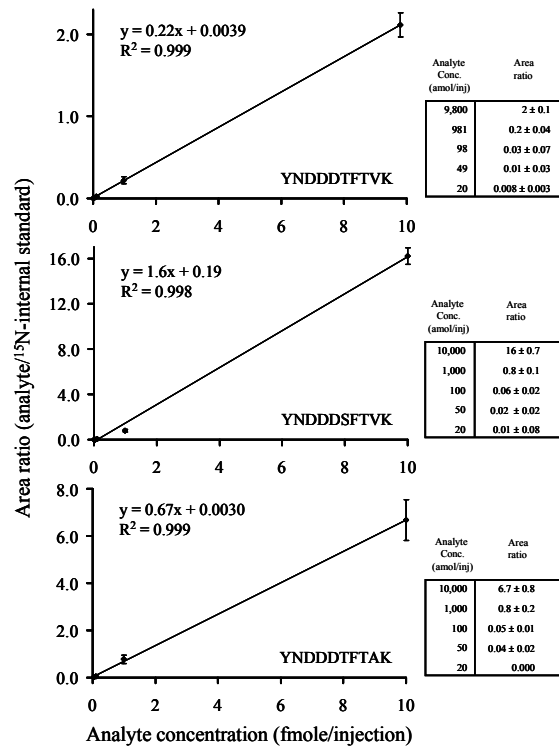

**Figure S3.** Calibration curves used to determine the empirical relationship between the concentration (~20 amole–10 fmole) of the analyte peptide and the respective <sup>15</sup>N-labeled internal standards. All analyte peptides are from Stx1 subtypes (YNDDDTFTVK, YNDDDSFTVK, and YNDDDTFTAK). All concentrations are reported as the mean (±standard deviation) of four injections. The data used to prepare a given curve is shown to the right of that curve.

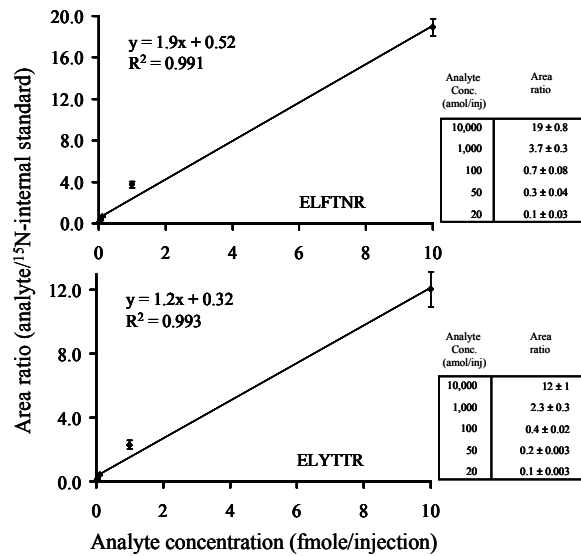

**Figure S4.** Calibration curves used to determine the empirical relationship between the concentration (~10 amole–10 fmole) of the ELFTNR (Stx1a) and ELYTTR (Stx1e) tryptic peptides and their respective <sup>15</sup>N-labeled internal standards. All concentrations are reported as the mean (±standard deviation) of four injections. The data used to prepare a given curve is shown to the right of that curve.

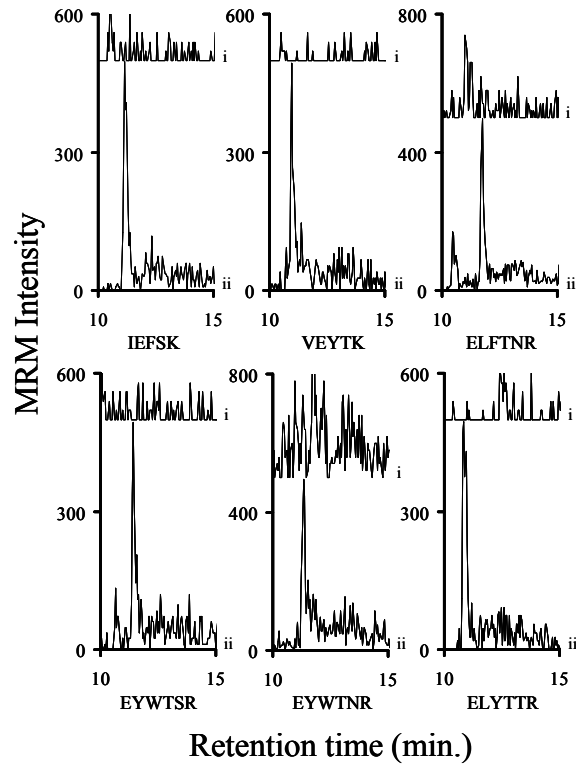

**Figure S5.** Chromatograms of the MRM signal intensities derived from the tryptic digests of human serum showing no interference with the  $y_3$  or the  $y_4$  ion of the IEFISK, VEYTK, ELFTNR, EYWTSR, EYWTNR, and ELYTTR peptides from Stx1 and Stx2 subtypes. The signals corresponding to the  $y_3$  or  $y_4$  ion of tryptic peptides from the Shiga-like toxins Stx2 (IEFSK;  $y_4$ ); Stx1 (VEYTK;  $y_4$ ); Stx1a (ELFTNR;  $y_4$ ); Stx2a, Stx2b, and Stx2c, (EYWTSR;  $y_4$ ); or Stx2d, Stx2e, Stx2f, and Stx2g (EYWTNR;  $y_3$ ); or Stx1e (ELYTTR;  $y_4$ ) are shown in each graph (i); Each sample was spiked with the corresponding  $^{15}\text{N}$ -labeled internal standard (ii); The signals for the ions from the corresponding  $^{15}\text{N}$ -labeled internal standards (ii) are normalized to 500. The other signals are not normalized. The graphs are offset for clarity.

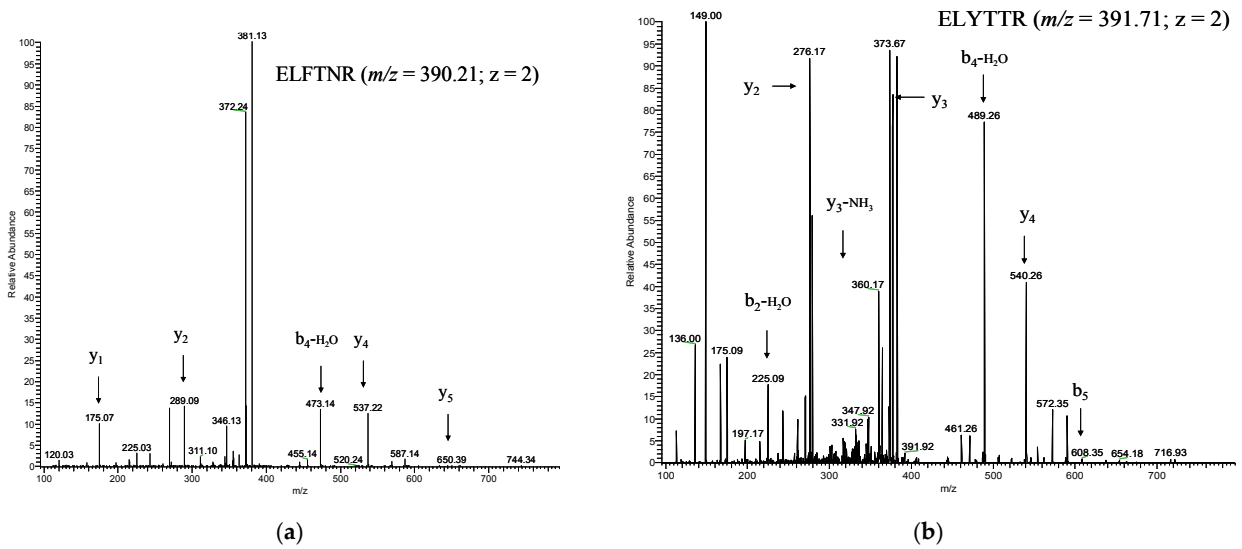

**Figure S6. Cont.**

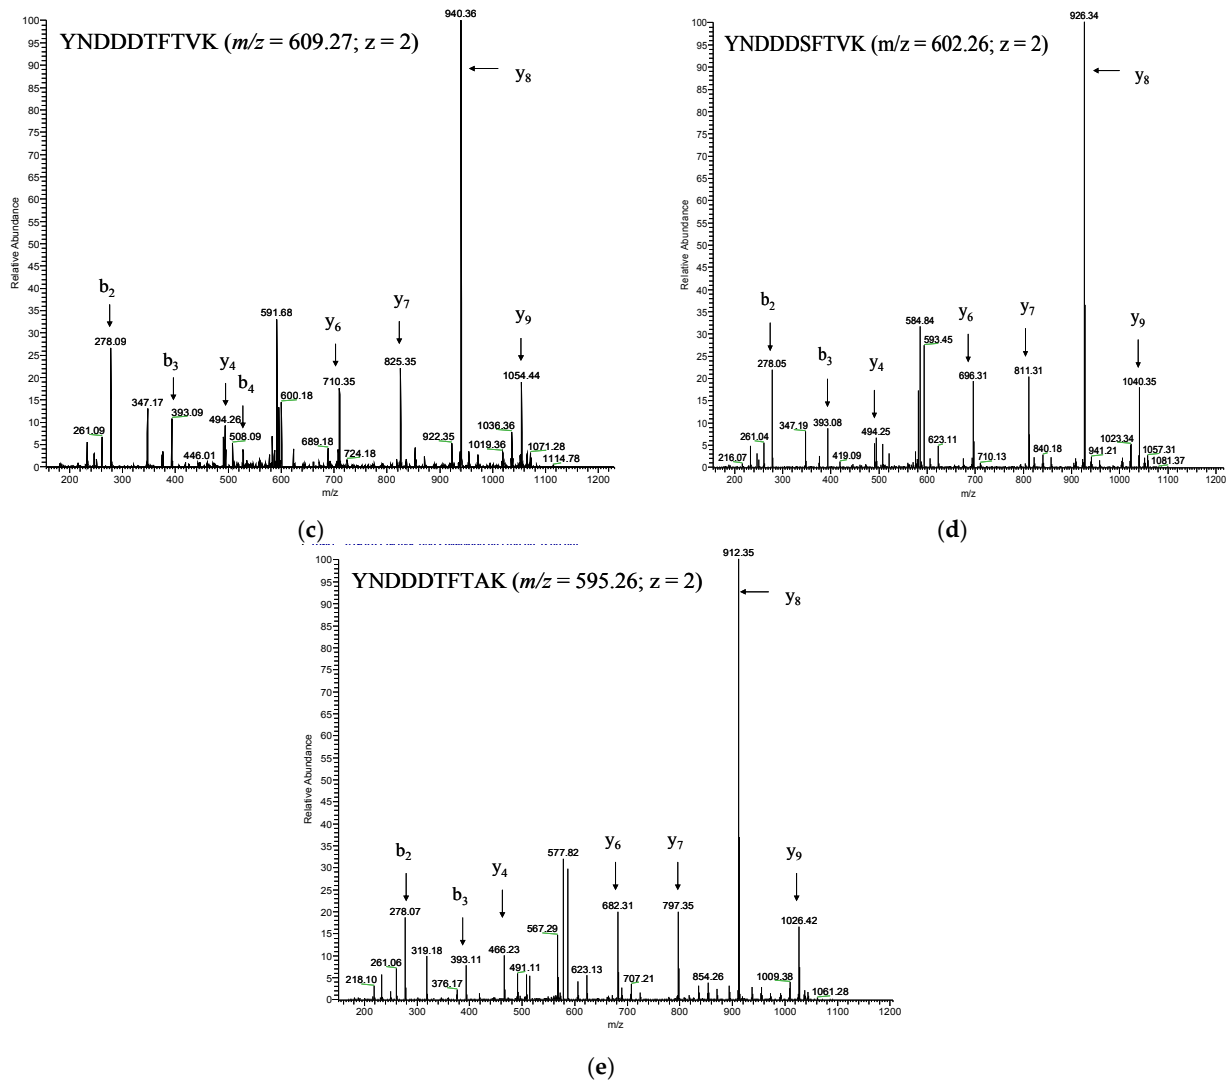

**Figure S6.** MS-MS fragmentation mass spectra of the synthetic peptides ELFTNR (a), ELYTTR (b), YNDDDTFTVK (c), YNDDDSFTVK (d), and YNDDDTFTAK (e). Samples were run on an Orbitrap elite instrument using full scan MS followed by MS-MS on the ten most intense ions. The difference between the calculated monoisotopic mass and the observed mass was 10 ppm or less for all five peptides.
